# Supplementary material for: Ambient Air Pollution and Out-of-Hospital Cardiac Arrest in Beijing, China
Source: PubMed Central journal article supplement (PMC5409624; doi:10.3390/ijerph14040423), 2017-04-14
Supplement: ijerph-14-00423-s001.pdf [file ijerph-14-00423-s001.pdf]

# Ambient Air Pollution and Out-of-Hospital Cardiac Arrest in Beijing, China

Ruixue Xia, Guopeng Zhou, Tong Zhu, Xueying Li and Guangfa Wang

## Supplementary Materials

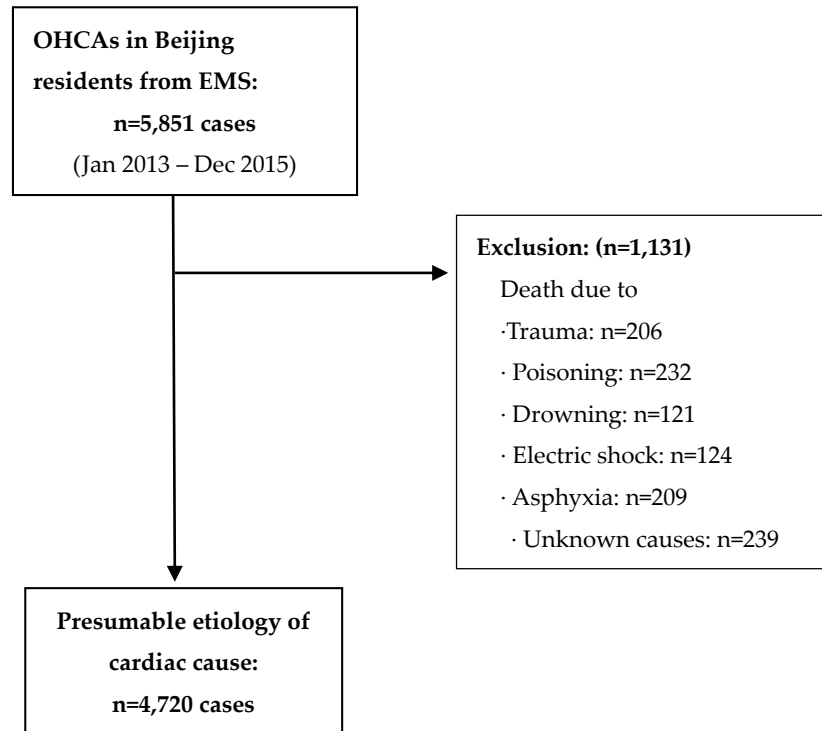

**Figure S1:** Flow diagram of study population. EMS: emergency medical service; OHCA: out-of-hospital cardiac arrest.

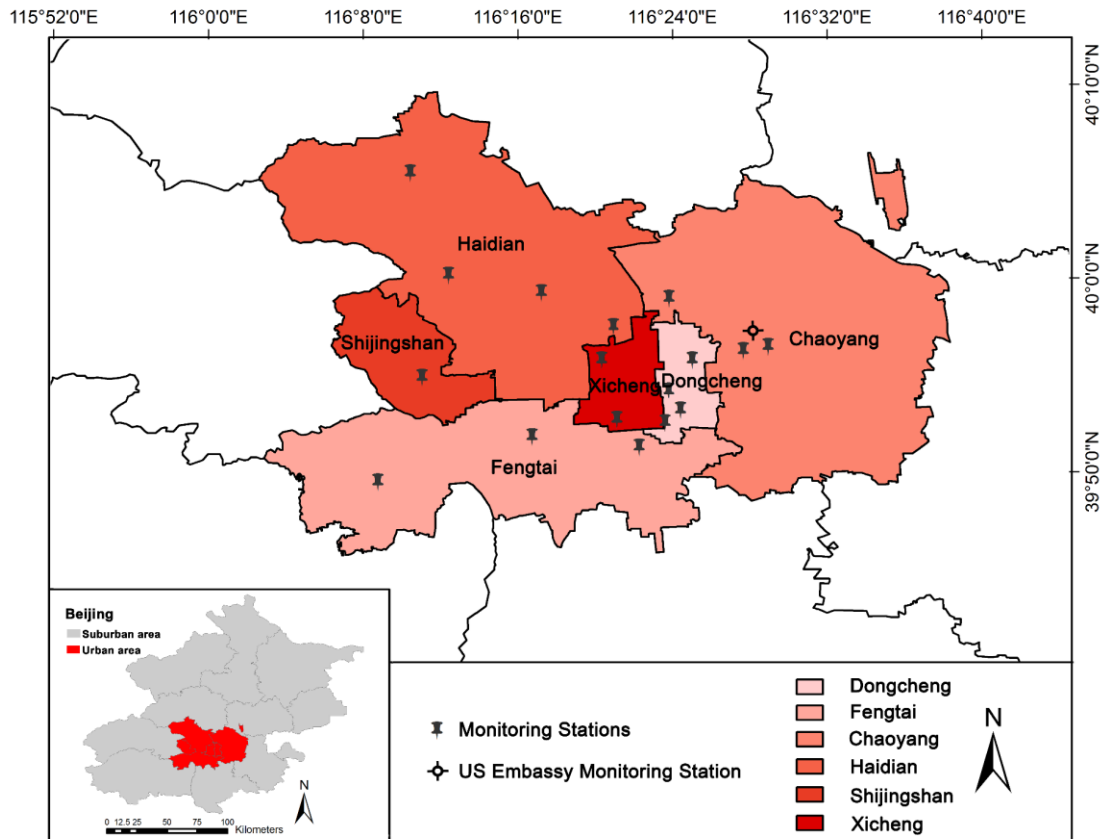

**Figure S2.** The distribution of all 17 air pollutant monitoring stations and the US Embassy monitoring station located in urban areas in Beijing, China. ArcGIS (ArcMap, version 10.0, ESRI Inc. Redlands, CA, USA) was used to create the map.

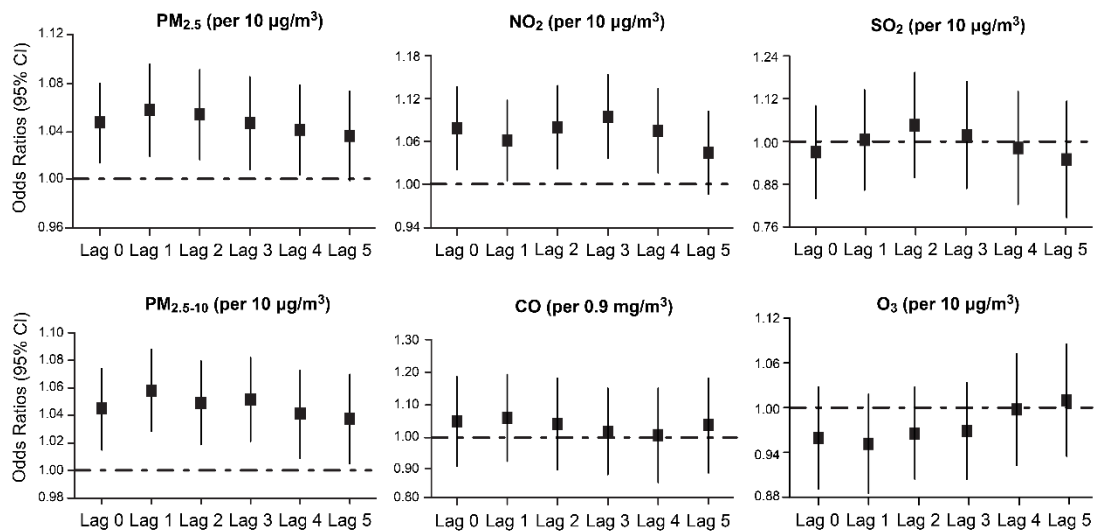

**Figure S3.** Sensitivity analyses performed using case-crossover models, with estimates from control days matched by temperature to within 0.5 °C. The risk of OHCA in single-pollutant models using various lag lengths. PM<sub>2.5</sub>: particles  $\leq 2.5$  µm in aerodynamic diameter; PM<sub>2.5-10</sub>:  $2.5 \leq$  particles  $\leq 10$  µm in aerodynamic diameter; SO<sub>2</sub>: sulfur dioxide; NO<sub>2</sub>: nitrogen dioxide; CO: carbon monoxide; O<sub>3</sub>: ozone.

**Table S1.** Spearman correlation coefficients among air pollutants, temperature and relative humidity (RH) in Beijing, China, during 2013-2015.

| Variable             | PM <sub>2.5</sub> | PM <sub>2.5-10</sub> | SO <sub>2</sub>   | NO <sub>2</sub>   | CO                | O <sub>3</sub>     | Temperature        | RH                |
|----------------------|-------------------|----------------------|-------------------|-------------------|-------------------|--------------------|--------------------|-------------------|
| PM <sub>2.5</sub>    | 1.00              | 0.89 <sup>b</sup>    | 0.63 <sup>b</sup> | 0.58 <sup>b</sup> | 0.49 <sup>b</sup> | -0.13              | -0.22 <sup>a</sup> | 0.23              |
| PM <sub>2.5-10</sub> |                   | 1.00                 | 0.51 <sup>b</sup> | 0.40 <sup>b</sup> | 0.42 <sup>b</sup> | -0.26 <sup>a</sup> | -0.23 <sup>a</sup> | 0.30 <sup>a</sup> |
| SO <sub>2</sub>      |                   |                      | 1.00              | 0.64 <sup>b</sup> | 0.37 <sup>a</sup> | -0.16              | -0.21              | 0.17              |
| NO <sub>2</sub>      |                   |                      |                   | 1.00              | 0.20              | -0.22 <sup>a</sup> | -0.29 <sup>a</sup> | 0.21              |
| CO                   |                   |                      |                   |                   | 1.00              | -0.15              | -0.19              | 0.26 <sup>a</sup> |
| O <sub>3</sub>       |                   |                      |                   |                   |                   | 1.00               | 0.35 <sup>a</sup>  | -0.22             |
| Temperature          |                   |                      |                   |                   |                   |                    | 1.00               | -0.25             |
| RH                   |                   |                      |                   |                   |                   |                    |                    | 1.00              |

<sup>a</sup>  $p < 0.05$ ; <sup>b</sup>  $p < 0.05$

**Table S2.** Estimates of OHCA for 10 µg/m<sup>3</sup> moving average of PM<sub>2.5</sub> concentrations increase in single- and multi-pollutant models at Lag Days 0–5.

|           | PM <sub>2.5</sub> unadjusted |          | PM <sub>2.5</sub> adjusted for PM <sub>2.5-10</sub> |          | PM <sub>2.5</sub> adjusted for SO <sub>2</sub> |          | PM <sub>2.5</sub> adjusted for SO <sub>2</sub> +NO <sub>2</sub> |          |
|-----------|------------------------------|----------|-----------------------------------------------------|----------|------------------------------------------------|----------|-----------------------------------------------------------------|----------|
|           | OR (95% CI)                  | <i>p</i> | OR (95% CI)                                         | <i>p</i> | OR (95% CI)                                    | <i>p</i> | OR (95% CI)                                                     | <i>p</i> |
| Lag Day 0 | 1.05 (1.02,1.08)             | <0.01    | 1.02 (1.00,1.04)                                    | 0.02     | 1.04 (1.02,1.07)                               | <0.01    | 1.02 (0.99,1.04)                                                | 0.07     |
| Lag Day 1 | 1.06 (1.03,1.09)             | <0.01    | 1.03 (1.01,1.05)                                    | <0.01    | 1.05 (1.03,1.08)                               | <0.01    | 1.03 (1.00,1.05)                                                | 0.03     |
| Lag Day 2 | 1.04 (1.02,1.07)             | <0.01    | 1.01 (1.00,1.03)                                    | <0.01    | 1.04 (1.01,1.07)                               | <0.01    | 1.03 (0.99,1.06)                                                | 0.19     |
| Lag Day 3 | 1.03 (0.99,1.07)             | 0.09     | 1.00 (0.98,1.03)                                    | 0.31     | 1.03 (0.99,1.06)                               | 0.12     | 1.03 (0.99,1.06)                                                | 0.22     |
| Lag Day 4 | 1.01 (0.99,1.04)             | 0.21     | 1.00 (0.98,1.02)                                    | 0.43     | 1.02 (0.99,1.05)                               | 0.16     | 1.00 (0.98,1.03)                                                | 0.38     |
| Lag Day 5 | 1.00 (0.98,1.03)             | 0.36     | 0.99 (0.97,1.02)                                    | 0.48     | 0.99 (0.98,1.02)                               | 0.36     | 0.99 (0.97,1.02)                                                | 0.51     |

**Table S3.** Estimates of OHCA for 10 µg/m<sup>3</sup> moving average of PM<sub>2.5-10</sub> concentrations increase in single- and multi-pollutant models at Lag Days 0–5.

|           | PM <sub>2.5-10</sub> unadjusted |          | PM <sub>2.5-10</sub> adjusted for PM <sub>2.5</sub> |          | PM <sub>2.5-10</sub> adjusted for SO <sub>2</sub> |          | PM <sub>2.5-10</sub> adjusted for SO <sub>2</sub> +NO <sub>2</sub> |          |
|-----------|---------------------------------|----------|-----------------------------------------------------|----------|---------------------------------------------------|----------|--------------------------------------------------------------------|----------|
|           | OR (95% CI)                     | <i>p</i> | OR (95% CI)                                         | <i>p</i> | OR (95% CI)                                       | <i>p</i> | OR (95% CI)                                                        | <i>p</i> |
| Lag Day 0 | 1.04 (1.02,1.06)                | <0.01    | 1.03 (1.00,1.06)                                    | <0.01    | 1.03 (1.01,1.05)                                  | <0.01    | 1.01 (1.00,1.03)                                                   | 0.02     |
| Lag Day 1 | 1.04 (1.01,1.07)                | <0.01    | 1.03 (1.00,1.07)                                    | <0.01    | 1.05 (1.02,1.07)                                  | <0.01    | 1.02 (1.01,1.04)                                                   | <0.01    |
| Lag Day 2 | 1.04 (1.02,1.07)                | <0.01    | 1.02 (0.99,1.05)                                    | 0.06     | 1.04 (1.02,1.06)                                  | 0.04     | 1.01 (1.00,1.01)                                                   | 0.01     |
| Lag Day 3 | 1.03 (0.99,1.07)                | 0.22     | 1.00 (0.98,1.03)                                    | 0.19     | 1.03 (1.01,1.06)                                  | 0.02     | 1.00 (0.99,1.02)                                                   | 0.12     |
| Lag Day 4 | 1.03 (0.99,1.06)                | 0.18     | 0.99 (0.96,1.03)                                    | 0.31     | 1.02 (0.99,1.04)                                  | 0.20     | 1.00 (0.98,1.02)                                                   | 0.18     |
| Lag Day 5 | 1.02 (0.98,1.05)                | 0.25     | 0.98 (0.97,1.02)                                    | 0.38     | 1.00 (0.98,1.03)                                  | 0.37     | 0.99 (0.97,1.03)                                                   | 0.33     |
